# Supplementary material for: Antifungal and Photocatalytic Potentials of Zinc Oxide Nanoparticles Synthesized Using Various Fruit Peel Aqueous Extracts
Source: Research Square preprint supplement (doi:10.21203/rs.3.rs-6965908/v1), 2025-07-23
Supplement: Supplementary file 1 [file c6a0a673f06ee6a98849b723.docx]

**Supplementary Information (S.I)**

**ANTIFUNGAL AND PHOTOCATALYTIC POTENTIALS OF ZINC OXIDE NANOPARTICLES SYNTHESIZED USING VARIOUS FRUIT PEEL AQUEOUS EXTRACTS**

Dailami S.A Masokano1*, Usman O.A Shuaibu1, Jude E. Emurotu1 and Pinkie Ntola2

1. *Department of Chemistry, Federal University Lokoja, PMB 1154 Lokoja-Nigeria*
2. *Department of Chemistry, Faculty of Applied Sciences, Durban University of Technology, P.O Box 1334, Durban 4000, South Africa*

**Corresponding email:* [*dailami.adam@fulokoja.edu.ng*](mailto:dailami.adam@fulokoja.edu.ng)*;* [*masokano09@gmail.com*](mailto:masokano09@gmail.com)

|  | 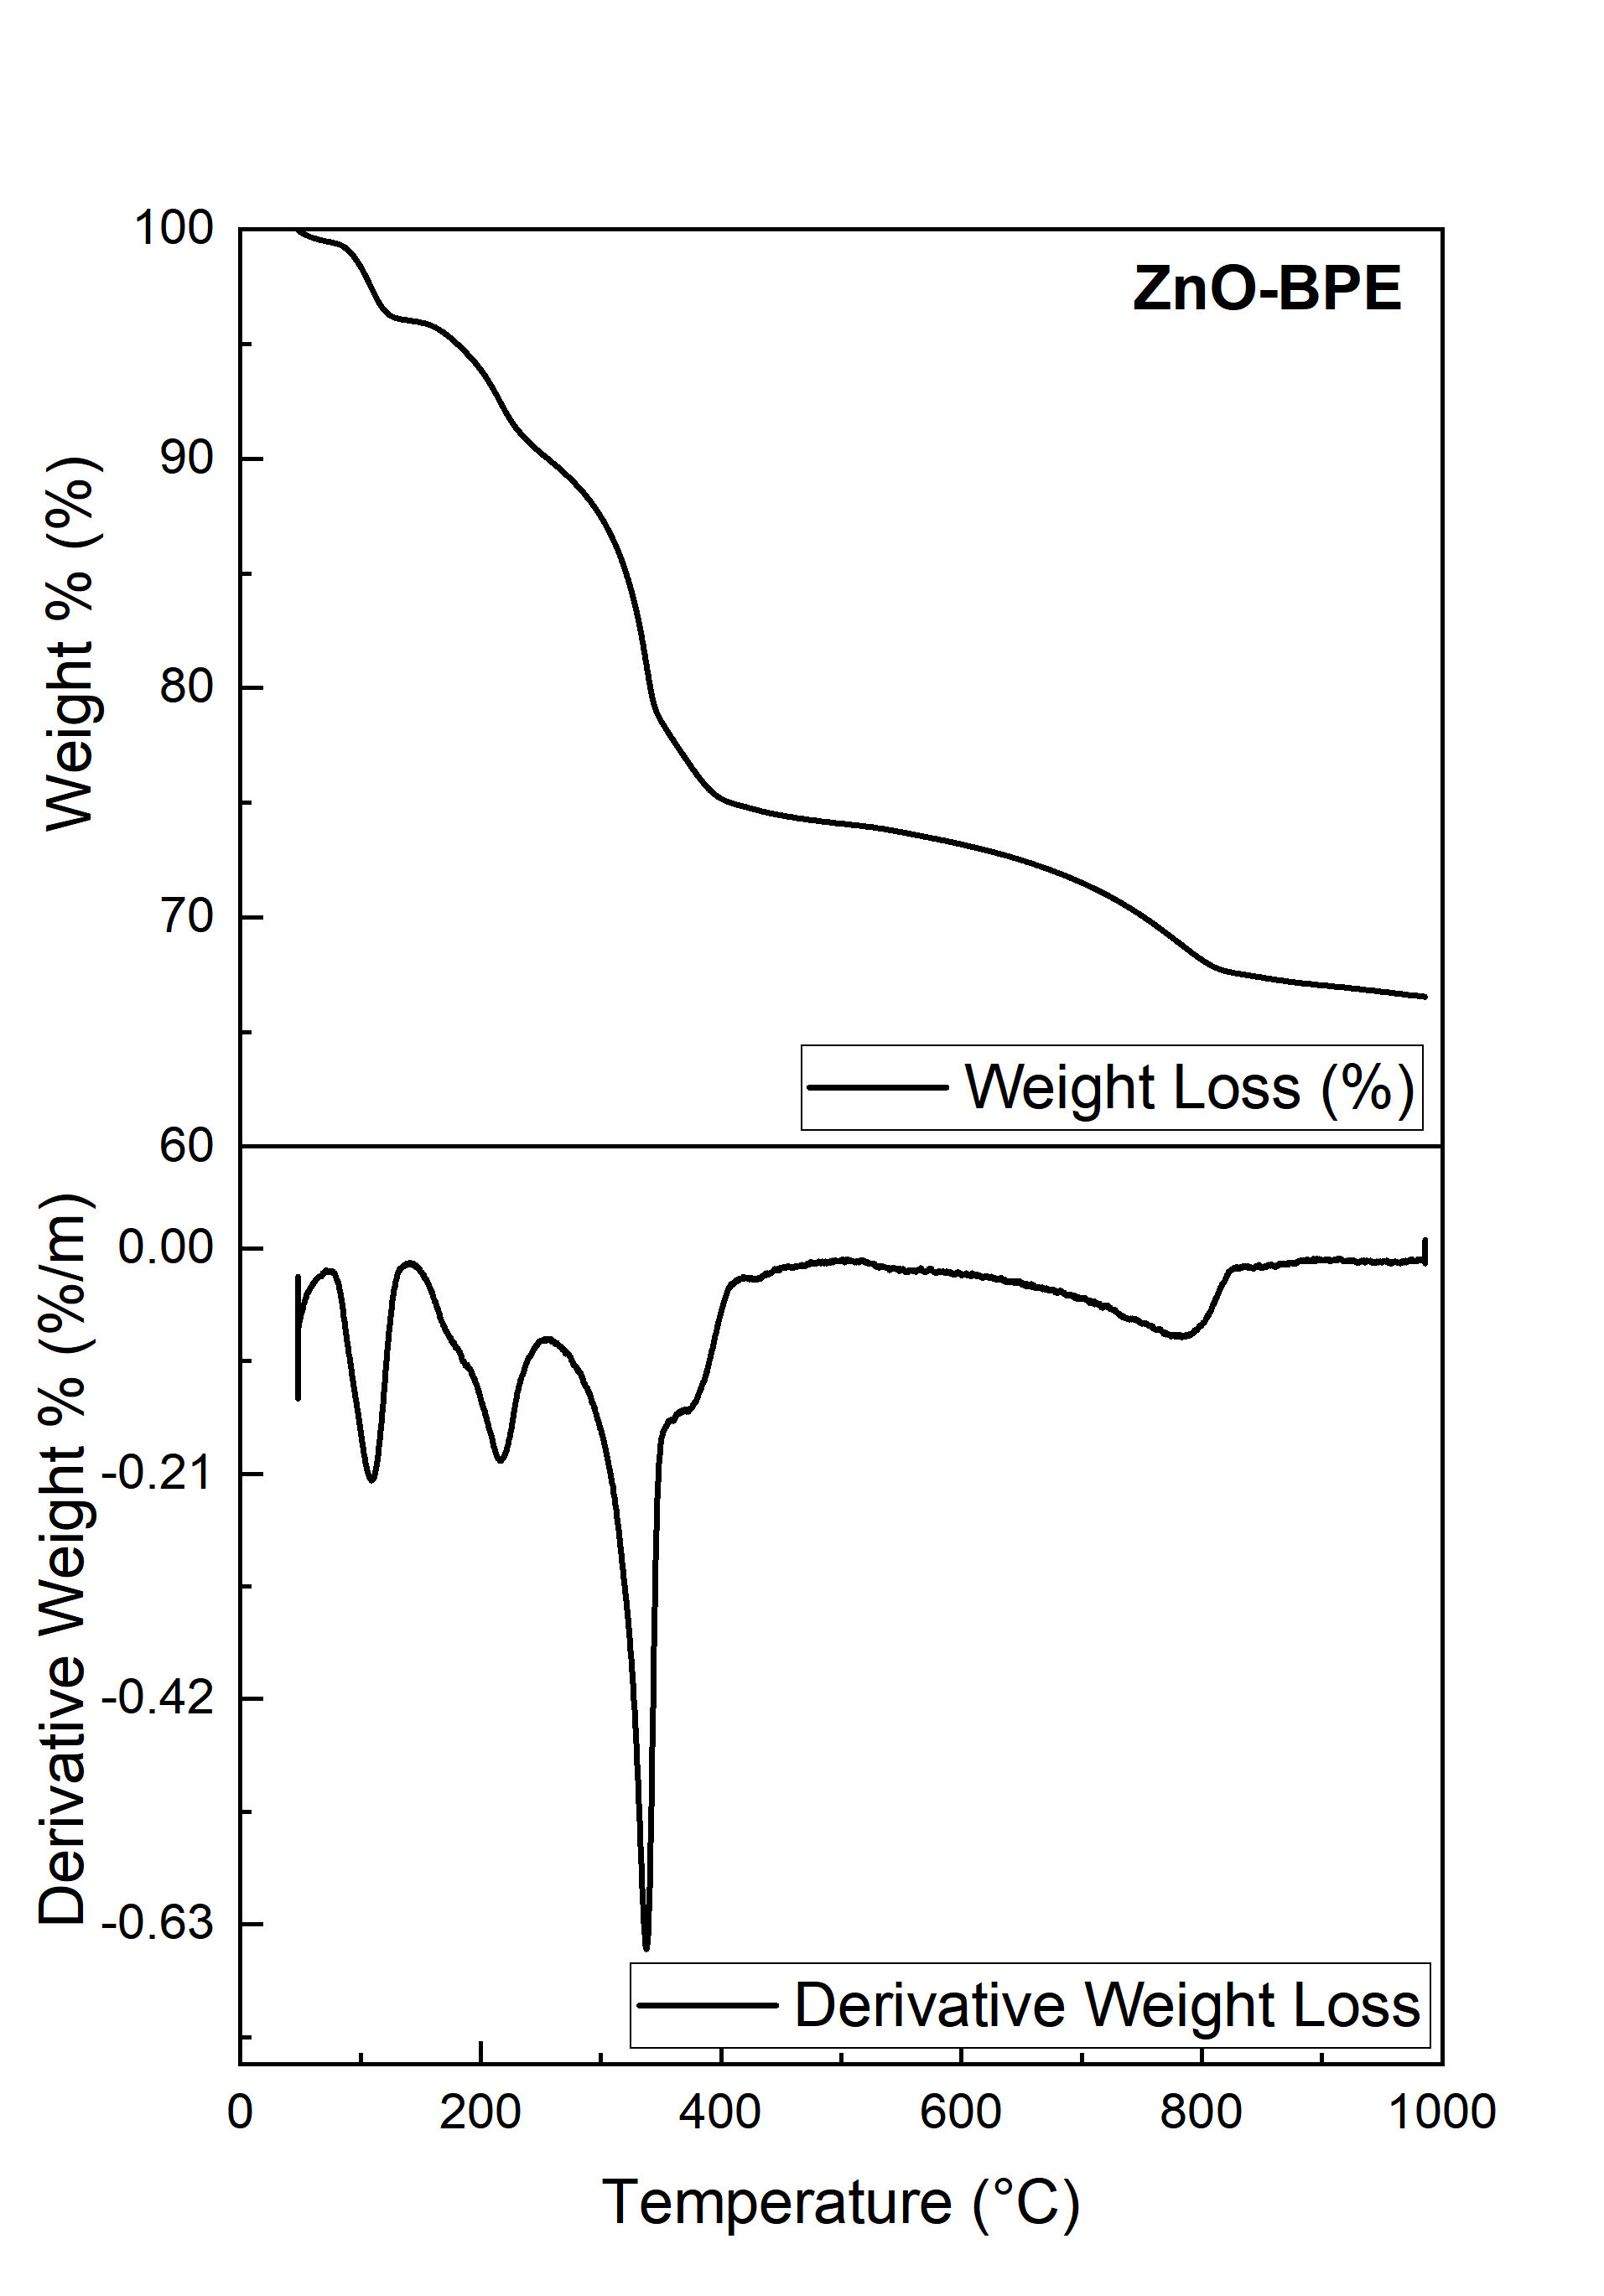 |
| --- | --- |
| 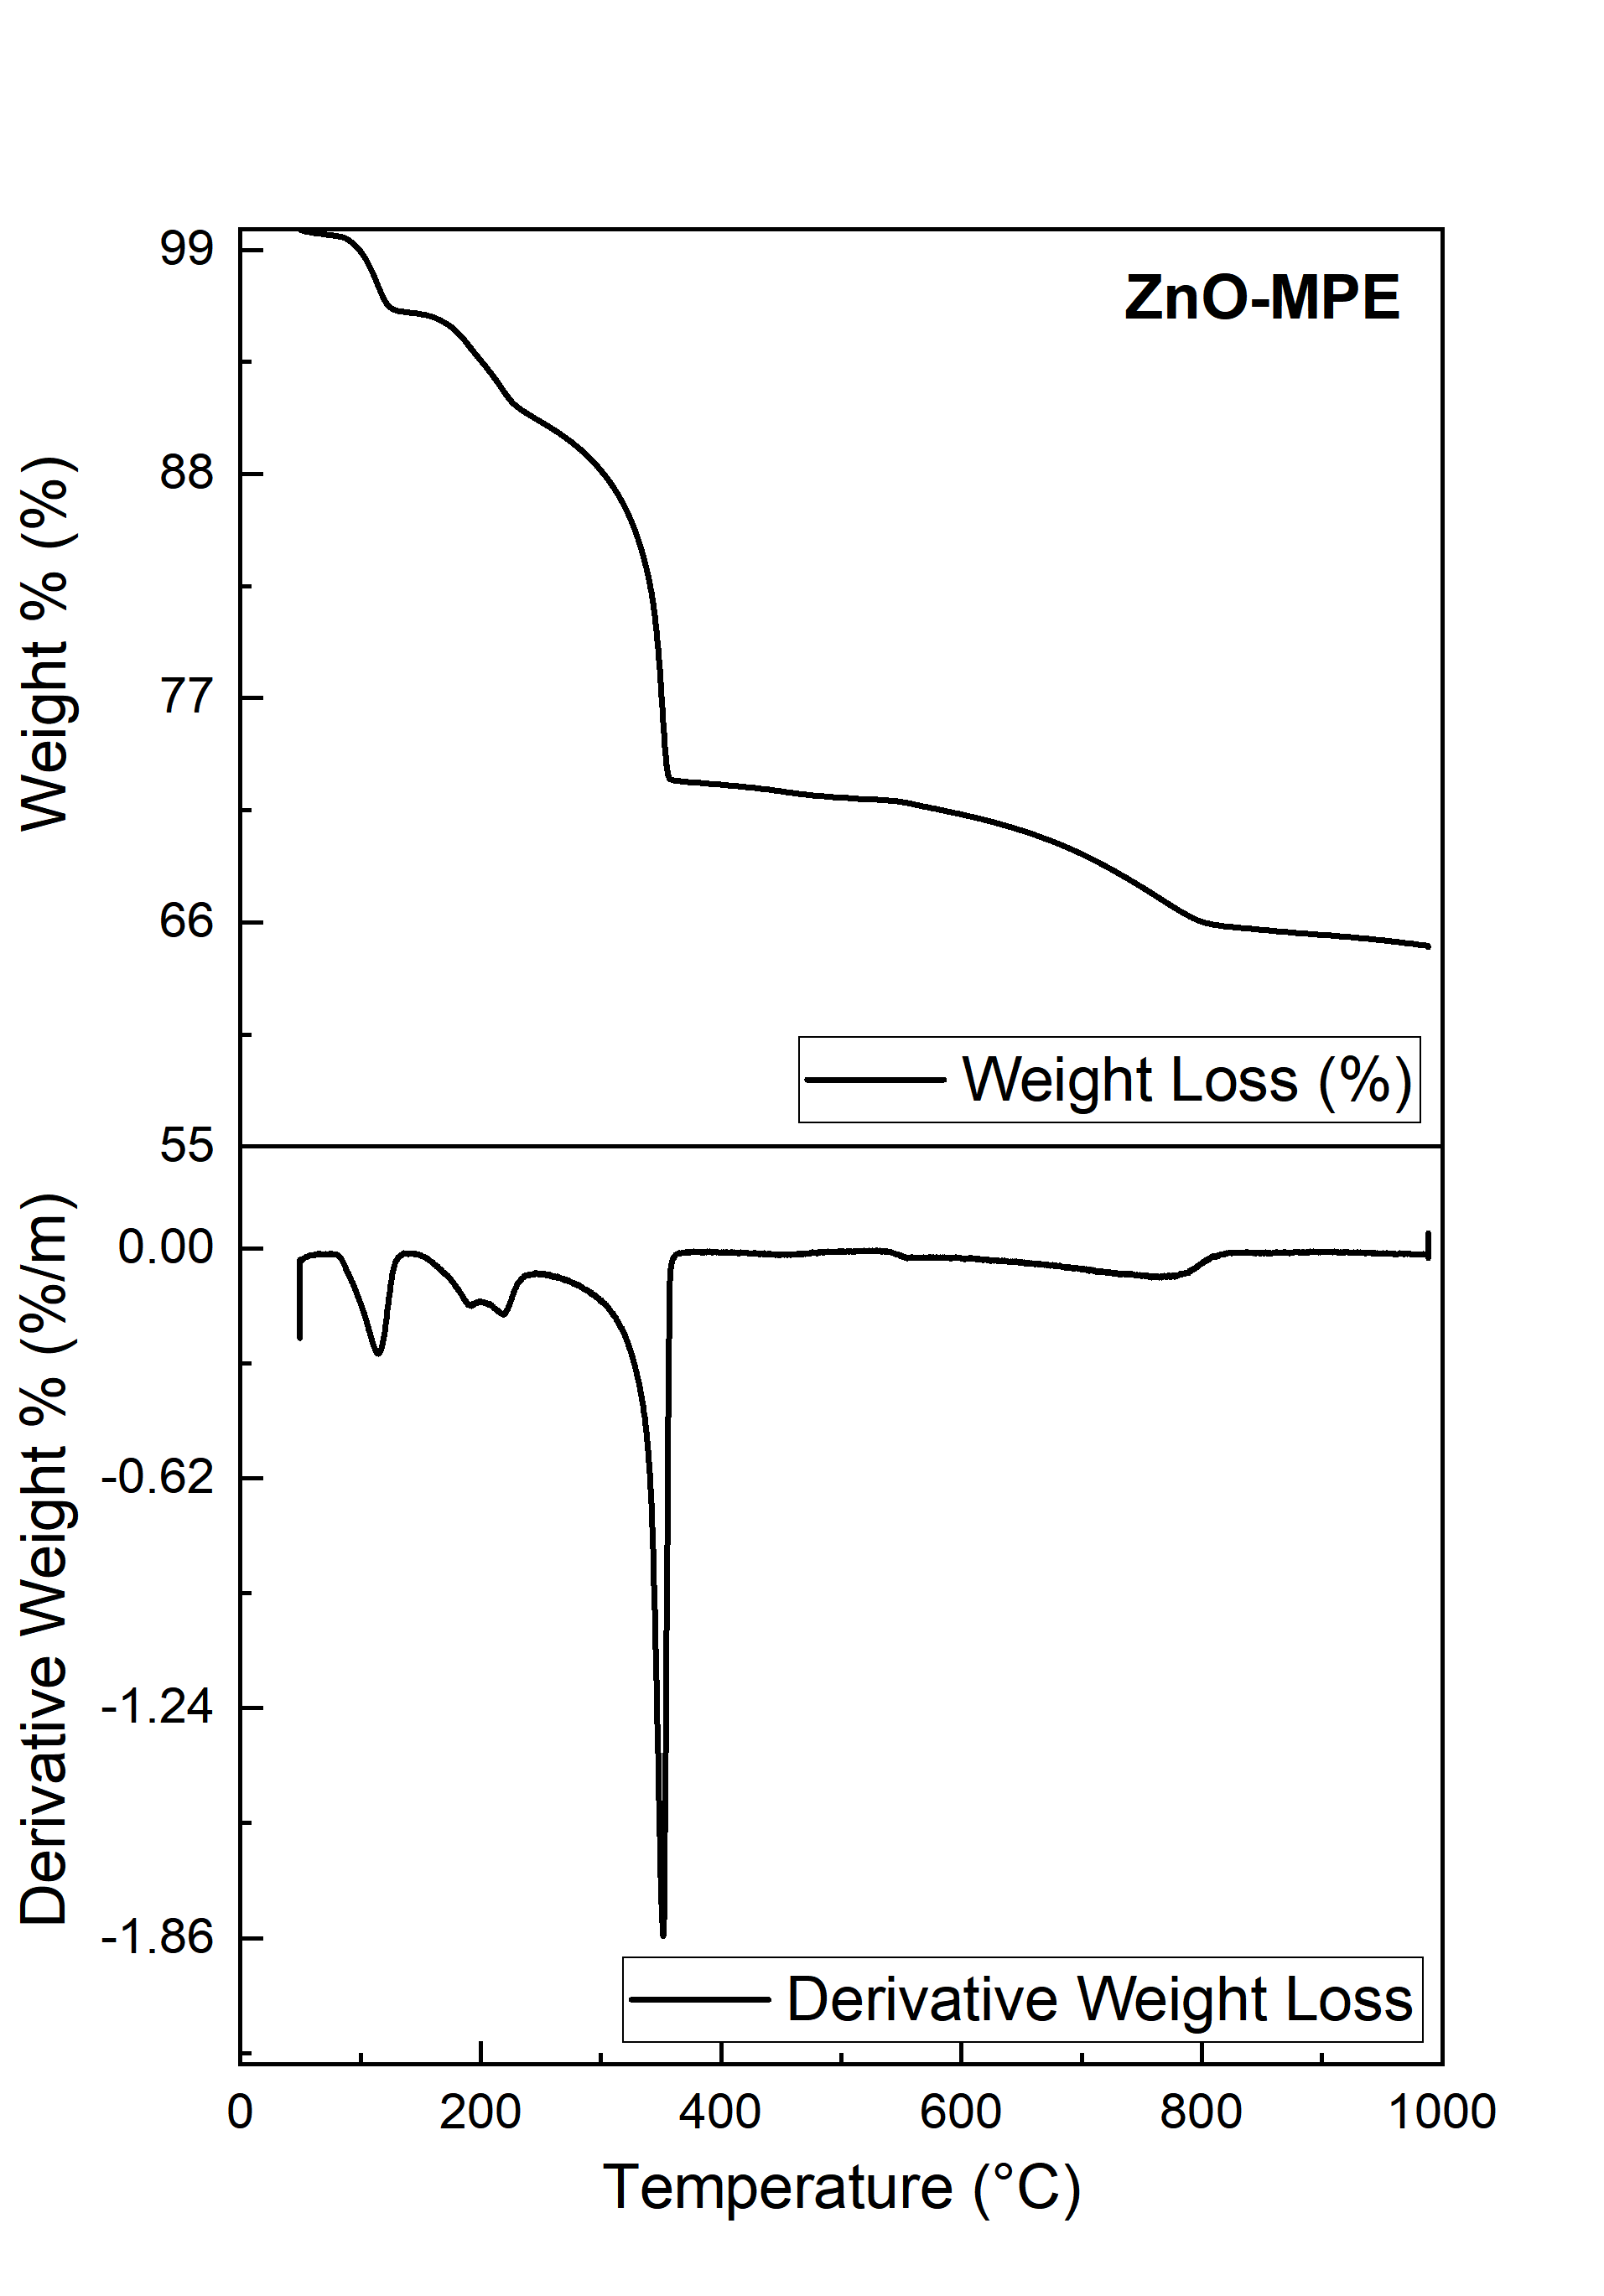 | 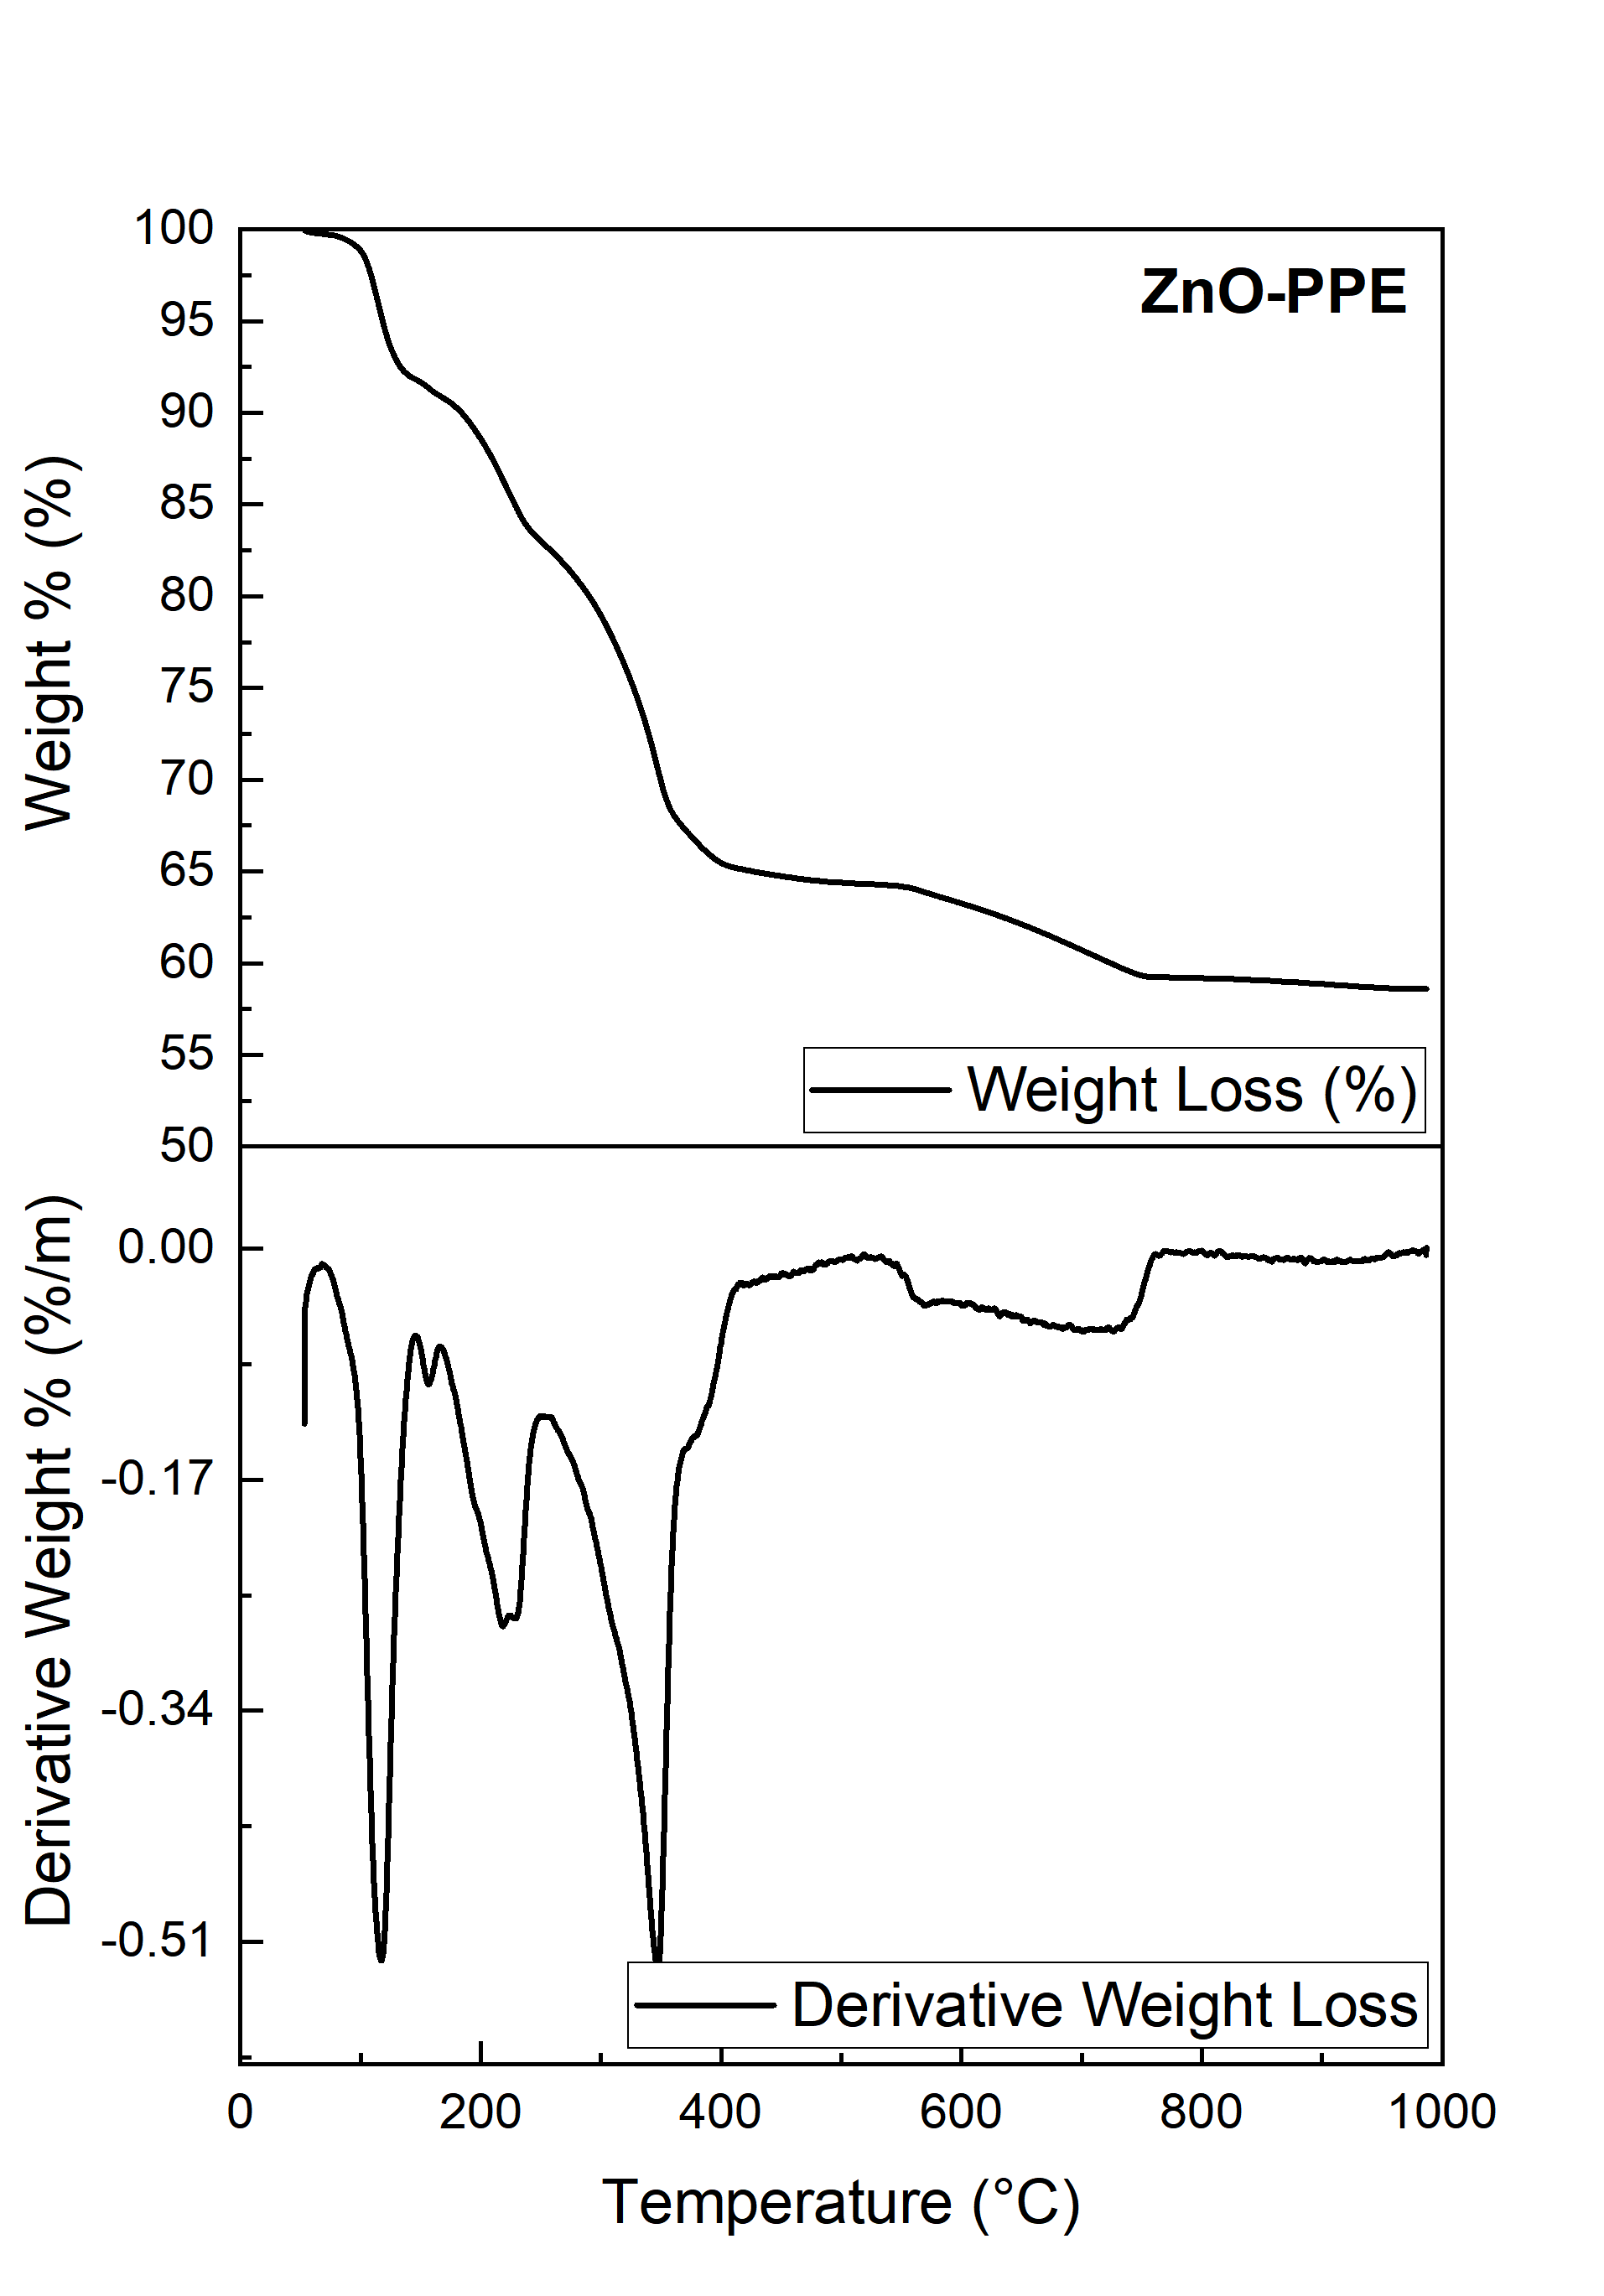 |

**Figure S1:** TGA and DTG analysis of the synthesized ZnONPs prior to calcination at 500 ºC

| **(a)** | **(b)** |
| --- | --- |
| **(c)** | **(d)** |

**Figure S2**: Tauc plot of indirect bandgap energy of the synthesized ZnONPs (a) ZnO-ppt (b) ZnO-BPE (c) ZnO-MPE and (d) ZnO-BPE

|  |   (b) |
| --- | --- |
| 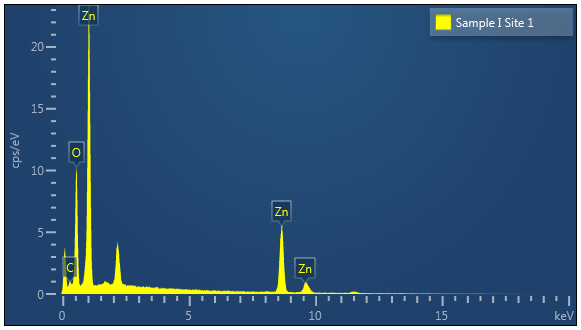  (c) | 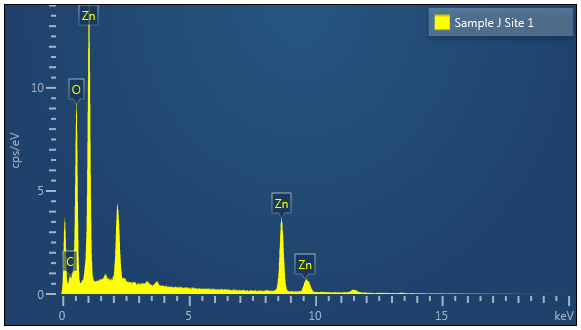  (d) |

(a)

**Figure S3**: SEM images of (a) ZnO-ppt and (b) ZnO-MPE, and EDX spectra of (c) ZnO-ppt and (d) ZnO-MPE.

|  |  |
| --- | --- |
| **ZnO-ppt** | **ZnO-BPE** |
|  |  |
| **ZnO-MPE** | **ZnO-PPE** |

**Figure S4**: TEM images of the synthesized ZnONPs





**Figure S5:** TEM images of **ZnO-ppt** sample showing hexagonal structure of ZnO particles at magnification of 50 nm

(b)

| (a) |  |
| --- | --- |
| (c) | (d) |

**Figure S6**: (a) and (b) showing absorbance spectra of the MB dye degradation under UV light for ZnO-ppt and ZnO-MPE respectively, (c) and (d) showing percentage degradation of MB over ZnO-ppt and ZnO-MPE respectively, over 120 min reaction period

**Figure S7**: XRD of the used ZnO-MPE sample after three regeneration cycles.


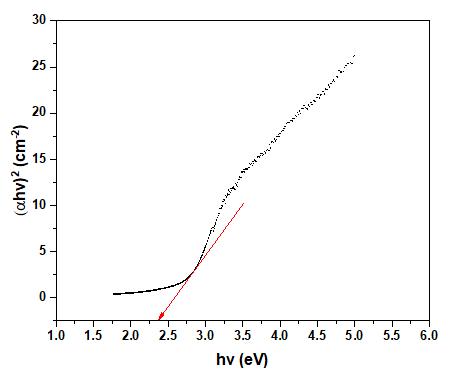


**(a)**

**(b)**

**Figure S8:** (a) UV-vis DRS and (b) bandgap energy (Tauc plot) of the used ZnO-MPE sample after three regeneration cycles.
